# Supplementary material for: Narrow band resonance in the UV light region of a plasmonic nanotextured surface used as a refractive index sensor
Source: Royal Society of Chemistry journal article supplement (doi:10.1039/c7ra01642e), 2017-01-01
Supplement: c7ra01642e1.pdf [file c7ra01642e1.pdf]

Electronic Supplementary Material (ESI)

# Narrow band resonance in UV region of plasmonic nanotextured surface for refractive index sensor

Jingjing Liu, Tengfei Wang, Fuqiang Nie

*Division of Nanobionic Research, Suzhou Institute of Nano-Tech and Nano-Bionics, Chinese Academy of Sciences, Suzhou 215123, China.*

To further investigate the VOS sensing capabilities of PND-1 and PND-2, the  $C_2H_4(OH)_2$  solution with different concentration was chosen and injected into PDMS-based microfluidic channel. It can be seen from Fig. S1, resonances are shifted 17.7nm for PND-1, shifted 31.7nm for PND-2 of the two peaks. It can be observed that the sensitivities of two devices are linear, the correlation coefficient ( $R^2$ ) are 0.9952, 0.9632 for PND-1 and PND-2, respectively (Fig. S1). For sensing 100%  $C_2H_4(OH)_2$  solution, the sensitivities of two devices are 12.6(nm/RIU) for PND-1, 22.6(nm/RIU) for peak\_1 of PND-2, 22.8(nm/RIU) for peak\_2 of PND-2. Highest value of FOM are still found in PND-2 of peak\_1 with the value of 1.2 (Table S1).

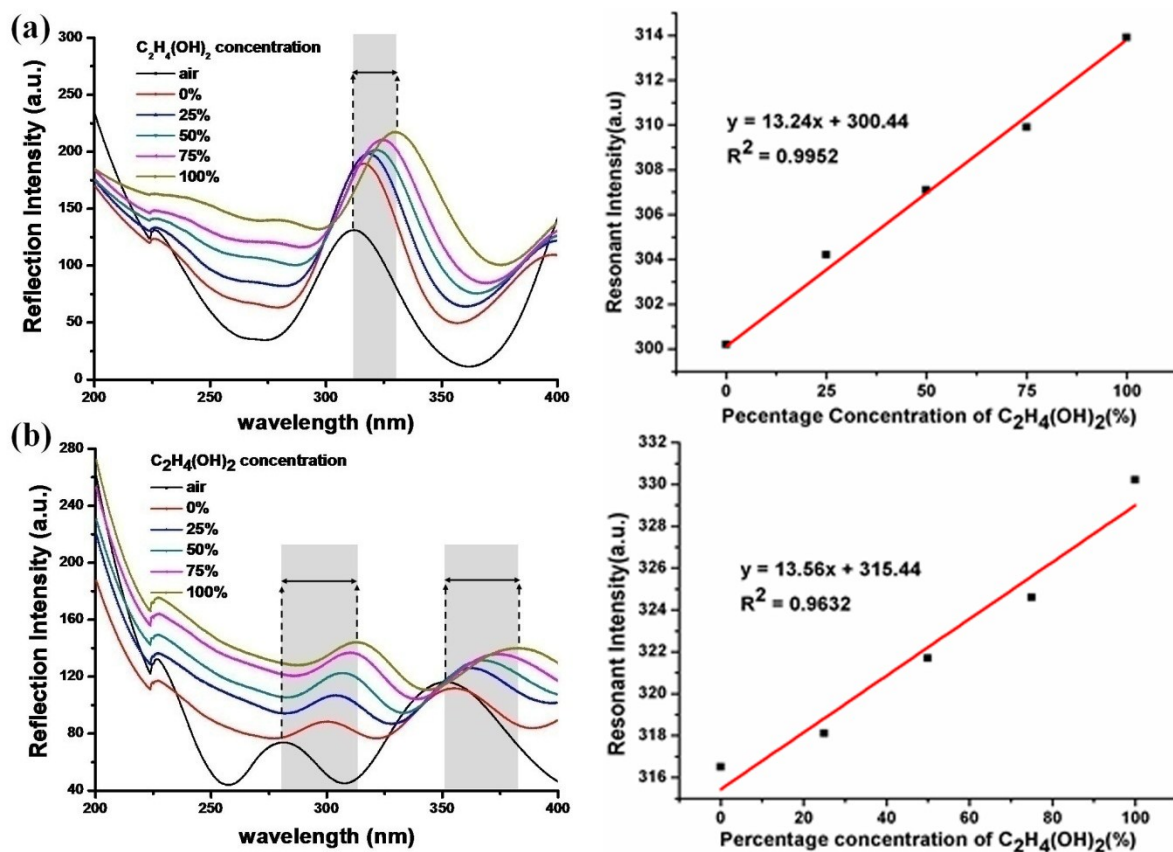

Fig. S1. The resonant wavelength shifting of PND-1 device(a) and PND-2 device (b) under different concentration of ethanediol, respectively.

Table S1. Sensing performance of PND as the refractive index sensor

| PND-1          | C <sub>2</sub> H <sub>4</sub> (OH) <sub>2</sub> | Resonant Shift ( $\Delta$ ) | FWHM | Sensitivity(nm/RIU) | FOM |
|----------------|-------------------------------------------------|-----------------------------|------|---------------------|-----|
|                | H <sub>2</sub> O                                | 4                           | 30   | 2.8                 | 0.1 |
|                | 25%                                             | 5.6                         | 32   | 4.0                 | 0.1 |
|                | 50%                                             | 9.2                         | 32   | 6.6                 | 0.2 |
|                | 75%                                             | 12.1                        | 34   | 8.6                 | 0.3 |
|                | 100%                                            | 17.7                        | 31   | 12.6                | 0.4 |
| PND-2 (peak_1) | C <sub>2</sub> H <sub>4</sub> (OH) <sub>2</sub> | Resonant Shift ( $\Delta$ ) | FWHM | Sensitivity(nm/RIU) | FOM |
|                | H <sub>2</sub> O                                | 18                          | 20   | 12.8                | 0.6 |
|                | 25%                                             | 22                          | 17   | 15.6                | 0.9 |
|                | 50%                                             | 24.9                        | 17   | 17.7                | 1.0 |
|                | 75%                                             | 27.7                        | 18   | 19.7                | 1.1 |
|                | 100%                                            | 31.7                        | 19   | 22.6                | 1.2 |
| PND-2 (peak_2) | C <sub>2</sub> H <sub>4</sub> (OH) <sub>2</sub> | Resonant Shift ( $\Delta$ ) | FWHM | Sensitivity(nm/RIU) | FOM |
|                | H <sub>2</sub> O                                | 4.9                         | 52   | 3.5                 | 0.1 |
|                | 25%                                             | 11.1                        | 31   | 8.0                 | 0.3 |
|                | 50%                                             | 16                          | 28   | 11.5                | 0.4 |
|                | 75%                                             | 21.9                        | 40   | 15.7                | 0.4 |
|                | 100%                                            | 31.7                        | 100  | 22.8                | 0.2 |
